1 Microbiome diversity and host immune functions may define the fate of sponge holobionts  
2 under future ocean conditions

3

4 Running title: Sponge holobionts under future ocean conditions

5

6 Niño Posadas<sup>1</sup>, Jake Ivan P. Baquiran<sup>1</sup>, Michael Angelou L. Nada<sup>1</sup>, Michelle Kelly<sup>2</sup>,  
7 Cecilia Conaco<sup>1\*</sup>

8

9 <sup>1</sup>Marine Science Institute, University of the Philippines Diliman, Quezon City, 1101,  
10 Philippines

11 <sup>2</sup>National Institute of Water and Atmospheric Research, Ltd., Auckland, New Zealand

12

13 \*Corresponding author:

14 Cecilia Conaco

15 E-mail: [cconaco@msi.upd.edu.ph](mailto:cconaco@msi.upd.edu.ph)

16

17

18

19

20

21

22

23

24 **Abstract**

25

26       The sponge-associated microbial community contributes to the overall health and  
27 adaptive capacity of the sponge holobiont. This community is regulated by the  
28 environment, as well as the immune system of the host. However, little is known about  
29 the effect of environmental stress on the regulation of host immune functions and how  
30 this may, in turn, affect sponge-microbe interactions. In this study, we compared the  
31 microbiomes and immune repertoire of two sponge species, the demosponge,  
32 *Neopetrosia compacta* and the calcareous sponge, *Leucetta chagosensis*, under varying  
33 levels of acidification and warming stress. *Neopetrosia compacta* harbors a diverse  
34 bacterial assemblage and possesses a rich repertoire of scavenger receptors while *L.*  
35 *chagosensis* has a less diverse microbiome and an expanded range of pattern recognition  
36 receptors and proteins with immunological domains. Upon exposure to warming and  
37 acidification, the microbiome and host transcriptome of *N. compacta* remained stable,  
38 which correlated with high survival. In contrast, the bacterial community of *L. chagosensis*  
39 exhibited drastic restructuring and widespread downregulation of host immune-related  
40 pathways, which accompanied tissue necrosis and mortality. Differences in microbiome  
41 diversity and immunological repertoire of diverse sponge groups highlight the central role  
42 of host-microbe interactions in predicting the fate of sponges under future ocean  
43 conditions.

44

45 **Introduction**

46

47           Since the industrial revolution, the ocean has taken up a substantial amount of CO<sub>2</sub>  
48   that has led to an increased marine inorganic carbon concentration, reduced pH, and  
49   decreased calcium carbonate saturation state (1). This global change in ocean chemistry,  
50   exacerbated by sea surface warming, can affect many organismal processes,  
51   consequently disrupting the reef population dynamics and ecosystem functioning (2). A  
52   meta-analysis of climate change-associated studies of abundant benthic groups revealed  
53   that sponges are likely winners under future climate scenarios (3).

54           Sponges (Porifera) are a major component of the benthic ecosystem and are  
55   responsible for many ecological processes, such as nutrient cycling, ecosystem  
56   structuring, reef consolidation, and bio-erosion (4). Sponges are generally thought to  
57   possess exceptional ecological adaptability, stemming from a complex physiology and  
58   diverse associated microbiome, that allows them to thrive even in extreme and perturbed  
59   environments (5). However, while most siliceous demosponges exhibit resistance and  
60   may even benefit from acidified ocean conditions, calcareous sponges are vulnerable  
61   when exposed to lower pH levels (6).

62           Poriferans forge a close relationship with diverse groups of microorganisms to form  
63   a complex structured ecosystem referred to as the holobiont (7). The microbial  
64   complement, which can constitute up to 35% of sponge biomass (8), has key roles in  
65   nutrient assimilation and metabolism, vitamin synthesis, and defense (9). However, the  
66   species-specific bacterial assemblage in sponges can undergo restructuring under  
67   drastic environmental perturbations (5). For example, elevated temperatures disrupt  
68   symbiotic functions in the demosponge, *Rhopaloeides odorabile* Thompson, Murphy,  
69   Bergquist & Evans, 1987, leading to holobiont destabilization and dysbiosis (10). While

70 this pattern of bacterial community dynamics usually precedes mass mortalities and is  
71 widely observed in holobiont systems under stress (11), alternative trajectories of  
72 microbiome plasticity promote rapid organismal adaptation (12, 13). For example, the  
73 metagenomic profile of the microbiome of *Coelocarteria singaporensis* (Carter, 1883) at  
74 CO<sub>2</sub> seeps have enhanced capacity to utilize the abundant inorganic carbon and exhibit  
75 metabolic features that are necessary for efficient carbon fixation and nitrogen  
76 metabolism in acidified conditions compared to individuals at control sites (14).  
77 Differences in the response of the bacterial community in the context of the organismal  
78 stress response determine the impact of environmental perturbations on different marine  
79 organisms (5).

80 The bacterial complement is shaped by various ecological selective forces acting  
81 within a holobiont. Resource limitation coupled with antagonistic interactions, such as  
82 interspecific competition and immune functions, fine-tune microbial populations that  
83 maintain holobiont homeostasis (15). However, the balance of these control mechanisms  
84 may be disrupted in disturbed conditions allowing the proliferation of opportunistic  
85 microbial taxa. The host's innate immune system, which is involved in sensing microbial  
86 cells and activating phagocytosis, cell death, or production of antimicrobial molecules,  
87 has been shown to respond to different stress signals in marine invertebrates (16-18).  
88 For example, elevated temperature induced the coordinated expression of pattern  
89 recognition receptors (PRRs), immune-related signaling cascades, and apoptosis  
90 regulators in the demosponge, *Haliclona (Reniera) tubifera* (George & Wilson, 1919) (19).  
91 Interestingly, the immune gene repertoire varies among sponges from different taxa (20,  
92 21) or in species with different microbiome composition (18, 22). For example, *Stylissa*

93 *carteri* (Dendy, 1889), a low microbial abundance (LMA) sponge, possesses an expanded  
94 family of proteins with scavenger receptor cysteine rich (SRCR)-like domains relative to  
95 the high microbial abundance (HMA) sponge, *Xestospongia testudinaria* (Lamarck, 1815)  
96 (22). Moreover, a survey of sponge transcriptomes revealed the absence of certain  
97 immune pathway components, such as myeloid differentiation primary response 8  
98 (*MyD88*), in the calcarean, *Sycon ciliatum* (Fabricus, 1780) (20). Distinct combinations of  
99 immune molecules may influence microbiome control in the sponge holobiont. Thus,  
100 elucidating the links between immune system functions and bacterial community  
101 structuring may provide a better understanding of inter-species differences in the  
102 tolerance of sponges to environmental stressors (23).

103 Here, we characterized the microbiomes and repertoire of immune-related genes in  
104 *Neopetrosia compacta* (Ridley & Dendy, 1886) (class Demospongiae, order  
105 Haplolsclerida, family Petrosiidae) and *Leucetta chagosensis* Dendy, 1913 (class  
106 Calcarea, order Clathrinida, family Leucettidae). We examined the response of these  
107 genes and of the sponge-associated microbial communities to varying stress conditions.  
108 In addition, we compared the immune gene repertoire and microbial diversity of other  
109 sponge species to elucidate common trends. We hypothesized that changes in sponge  
110 microbiome structure will correlate with changes in the expression of certain immune  
111 response genes. Our findings highlight the importance of host-microbe interactions in  
112 predicting the fate of marine sponges in the face of a rapidly changing ocean.

113

## 114 **Material and Methods**

115

116 Sponge sampling and culture

117

118 Six specimens each of *N. compacta* and *L. chagosensis* were collected from the  
119 Bolinao-Anda Reef Complex in Pangasinan, northwestern Philippines (16.296° N,  
120 120.014° E), in September 2018 with permission from the Philippines Department of  
121 Agriculture (Gratuitous Permit No. 0169-19). Sponge identities were confirmed by their  
122 morphology (24) and 28S rRNA gene analyses (Fig. S1). Donor sponges were cut into  
123 twelve ( $\approx 1 \text{ cm}^3$ ) fragments using a sterile razor and allowed to heal *in situ* for 30 days.  
124 Healed fragments were brought to the Bolinao Marine Laboratory and allowed to  
125 acclimatize for seven days in aquaria receiving flow-through seawater under ambient  
126 conditions of pH 8.0 and 28°C.

127

128 Stress response experiments

129

130 Stress response experiments were conducted in independently aerated 10L aquaria  
131 with flow-through seawater. Temperatures were regulated using 300W submersible  
132 heaters, levels of injected CO<sub>2</sub> manipulated with mass flow controller, and the illumination  
133 followed a 12:12 light: dark photoperiod using daylight LED lamps. Conditions were  
134 designed to simulate the present day and predicted 2100 Representative Concentration  
135 Pathway (RCP) 6.0 and 8.5 scenarios (25). Treatment conditions included (i) pH 8.0, 28°C  
136 (Present Day), (ii) pH 7.6, 28°C (Acidification), (iii) pH 8.0, 32°C (Warming), (iv) pH 7.8,  
137 30°C (RCP 6.0), and (v) pH 7.6, 32°C (RCP 8.5). Each treatment was represented by four  
138 independent replicate aquaria containing three fragments of each sponge species.

139 Temperature and pH levels were changed gradually (temperature: +1°C/day, pH: -  
140 0.5/day) until the desired conditions were reached (Fig. S2). Treatment conditions were  
141 maintained for up to three days when the experiment was terminated because tissue  
142 necrosis had begun to manifest in some fragments. Tissues of surviving sponges were  
143 washed with UV filtered seawater, flash-frozen in liquid nitrogen, and stored at -80°C.  
144 Light and temperature in the tanks were monitored using submersible loggers (HOBO  
145 pendant, Onset Computer Corp., Bourne, MA, USA), pH was measured using a SevenGo  
146 Duo Pro pH meter (Mettler Toledo, Columbus, OH, USA), and DO and salinity were  
147 measured using a multiparameter meter (Pro 2030, YSI Inc., Yellow Springs, OH, USA).  
148 Dissolved inorganic carbon and total alkalinity (TA) were quantified using a TA Analyzer  
149 (Kimoto Electric, ATT-05, Japan). Seawater carbonate chemistry parameters were  
150 calculated from pH, TA, temperature, and salinity data using the CO2SYS package (Table  
151 S1) (26).

152

### 153 16S rRNA gene sequencing and analysis

154

155 Total genomic DNA was extracted from sponge tissues (three biological replicates  
156 per species for each treatment) using DNeasy PowerSoil Pro Kit (Mo Bio, Carlsbad, CA,  
157 USA). DNA concentration was quantified using a NanoDrop spectrophotometer (Thermo  
158 Fisher Scientific). DNA extracts were sent to Macrogen, South Korea, for sequencing.  
159 Bacterial 16S rRNA V3-V4 hypervariable region was amplified from the extracted DNA  
160 using barcoded primers Bakt\_341F (5'-CCTACGGGNGGCWGCAG-3') and Bakt\_805R  
161 (5'-GACTACHVGGGTATCTAATCC-3') (27). Paired-end sequencing (300 bp) was

162 performed on the Illumina MiSeq platform following the dual-index sequencing strategy.

163 Sequences were processed using QIIME2 version 2019.7(28). The DADA2 package  
164 (29) was used to remove chimeric sequences and singletons, and to correct amplicon  
165 errors. The denoised forward and reverse reads were assembled into single contigs. The  
166 taxonomic assignment of processed sequences was carried out using a Naïve Bayes  
167 classifier trained on SILVA version 132 (30). The classifier was set to include V3-V4  
168 regions of 16S rRNA genes at 99% sequence similarity. Sequence reads from  
169 chloroplasts and mitochondria were removed from the final set of Amplicon Sequence  
170 Variants (ASVs). Raw sequence reads can be accessed in the NCBI Short Read Archive  
171 database under the BioProject ID PRJNA689294.

172

173 Microbial community composition analysis

174

175 Rarefied ASV libraries were produced through random down-sampling to the  
176 identified smallest library size. Alpha diversity indices were computed using Phyloseq  
177 (31). Community distance matrices based on Bray-Curtis dissimilarity index were  
178 estimated using vegan (32) and visualized by non-metric multidimensional scaling.  
179 ADONIS and ANOSIM tests were performed to evaluate changes in the structure and  
180 composition of bacterial communities across treatments. Responsive ASVs were  
181 described through pairwise comparisons between Present Day samples versus samples  
182 subjected to (i) Acidification, (ii) Warming, (iii) RCP 6.0, and (iv) RCP 8.5. Differentially  
183 abundant ASVs (log fold change  $\geq |2|$ , Benjamini-Hochberg-adjusted p-value  $\leq 0.1$ ) were  
184 identified across treatments using Phyloseq-DESeq (33) implemented in R.



185

186 Functional prediction and analyses

187

188 Phylogenetic Investigation of Communities by Reconstruction of Unobserved  
189 States (PICRUSt2) (34), installed as QIIME2 plugin, and Tax4Fun2 (35) were used to  
190 predict the functional profiles of the bacterial communities. These tools use marker genes,  
191 such as 16S rRNA, to predict community gene counts based on ASV taxon affiliations.  
192 The weighted Nearest Sequenced Taxon Index (NSTI) cut-off score was set to 2.0 to  
193 increase accuracy of PICRUSt2 predictions. The NSTI score summarizes the relatedness  
194 of the ASVs in the sample to the closest available reference genome and serves as a  
195 basis for assessing the quality of prediction. Low NSTI values indicate higher similarity to  
196 the reference genomes and, thus, more accurate functional gene prediction (34). KEGG  
197 ortholog (KO) prediction and abundance estimation was performed and associated high-  
198 level functions were determined using the `pathway_pipeline.py` script with a KEGG  
199 pathways mapping file. In Tax4Fun, representative sequences were searched against the  
200 Ref100NR database to find the closest reference genome using NCBI blast+. Thereafter,  
201 KO counts and KEGG pathway profiles were predicted using the  
202 `makeFunctionalPrediction` command.

203 Changes in the predicted functional potential of the bacterial communities were  
204 described through pairwise comparisons between Present Day samples versus samples  
205 subjected to the other treatments. Differentially abundant KOs (Benjamini-Hochberg-  
206 adjusted  $p$ -value  $\leq 0.05$ ) were identified across treatments using Phyloseq-DeSeq (33)  
207 implemented in R. The combined set of differentially abundant KOs across treatments

208 was searched against the KEGG database using the KEGG mapper-search pathway  
209 mapping tool. The relative abundance of the retrieved KEGG pathways was then  
210 calculated from the sum of the relative abundance of the associated KOs.

211

212 Transcriptome sequencing, assembly, and annotation

213

214 Total RNA was extracted from *N. compacta* and *L. chagosensis* samples using  
215 TRIzol (Invitrogen, Waltham, MA, USA). Contaminating DNA was removed using TURBO  
216 DNA-free kit (Invitrogen). RNA concentration was determined using a NanoDrop  
217 spectrophotometer (Thermo Fisher Scientific, Waltham, MA, USA). The integrity of RNA  
218 extracts was evaluated using gel electrophoresis on 1% agarose in 1x TBE and the  
219 Agilent 2200 TapeStation System (Agilent Technologies, Santa Clara, CA, USA).  
220 Libraries were prepared from three samples per treatment, except for the *L. chagosensis*  
221 Warming and RCP 6.0 treatments, for which we were only able to obtain high quality RNA  
222 for two samples each. Barcoded libraries were prepared at Macrogen, South Korea, using  
223 the Truseq RNA library preparation kit (Illumina, San Diego, CA, USA). mRNA-enriched  
224 libraries were sequenced on the Illumina Novaseq 6000 platform to generate 100 bp  
225 paired-end reads.

226 Raw sequence reads were visualized with FastQC v0.11.8 (Babraham  
227 Bioinformatics) and trimmed using Trimmomatic v0.32 (36). Filtering included the removal  
228 of poor quality bases (quality score < 3) at the start and end of the reads, scanning the  
229 read with a 4-base sliding window, trimming if the average per-base quality is below 20,  
230 excluding reads below 36 bases long, and cutting 15 bases from the start of the reads.

231 *De novo* transcriptome assembly was carried out on Trinity (37). Transcripts with  
232 90% sequence similarity were clustered and the longest representative contigs (>300bp)  
233 were retained. Reads were mapped back to the assembled transcriptomes and isoforms  
234 with zero isoform percentage (IsoPct) were removed to filter out putative misassembled  
235 transcripts. Isoforms with the highest combined IsoPct or longest length were retained for  
236 each transcript to generate a reference transcriptome for each species. The non-  
237 redundant transcriptomes of *N. compacta* and *L. chagosensis* are composed of 69 202  
238 (N50= 1 150) and 92 629 (N50=1 475) transcripts, respectively. The quality of the  
239 assembled transcriptome is comparable to other Poriferan transcriptomes (20, 38) as  
240 assessed through Bowtie (39), Detonate (40), and Transrate (41) (Table S2). Highly  
241 expressed transcripts were also determined to have high contig length (Fig. S3). The  
242 assembly contains more than 90% of the metazoan core genes measured through  
243 BUSCO (42) with Metazoa *odb9* dataset (Table S2). Raw sequence reads were deposited  
244 in the NCBI Short Read Archive database under BioProject ID PRJNA689294. The  
245 reference transcriptomes used in this study has been deposited at DDBJ/EMBL/GenBank  
246 under the accession GIYW000000000 (*N. compacta*) and GIYV000000000 (*L.*  
247 *chagosensis*). The version described in this paper  
248 are the first versions, GIYW01000000 and GIYV01000000, respectively.

249 *N. compacta* and *L. chagosensis* peptides were predicted using the Transdecoder  
250 package in Trinity. Peptides were mapped against the UniProtKB/Swiss-Prot database  
251 (April 2020). To predict gene ontology (GO) annotations, the top Blastp hit for each  
252 sequence was used as input into Blast2GO (43), while protein domains were annotated

253 by mapping the peptide sequences against Pfam 32.0 database (44) using HMMER v3.3  
254 (45).

255

256 Expression analysis

257

258 Reads were mapped to the assembled reference transcriptomes to estimate  
259 transcript abundance using RNA-Seq by Expectation Maximization (RSEM) (46) with  
260 bowtie alignment method (39). Differentially expressed transcripts were identified using  
261 the edgeR (47) package in R. Expected counts were converted to counts per million  
262 (CPM) and only genes with >10 CPM in at least two libraries were included in the analysis.

263 Genes were considered differentially expressed if up or downregulation was greater than  
264 4-fold relative to the controls with a Benjamini-Hochberg-adjusted p-value  $<1 \times 10^{-5}$ .

265 Pairwise comparisons were conducted between control samples (Present Day) and  
266 samples subjected to the other treatments. Functional enrichment analysis for  
267 differentially expressed transcripts was done using the topGO package (48) in R. Only  
268 GO terms with a p-value  $<0.05$  were considered significantly enriched. Protein-protein  
269 interactions for sponge homologs of genes involved in the human innate immune  
270 response were retrieved from the STRING v.11 database (49). Interaction networks were  
271 visualized using Cytoscape v.3.7.2 (50). Relative expression of sponge gene homologs  
272 in each treatment relative to the Present Day control was computed as the average sum  
273 of  $\log_2$  transformed transcripts per million (TPM).

274

275 Comparative analysis of bacterial communities and predicted metagenomes

276

277 Selected datasets from the Sponge Microbiome Project (51) were retrieved from the  
278 Qiita database under Study ID: 10 793 (March 2020). Sequences from healthy adult  
279 individuals viz. Demospongiae (n = 1441), Calcarea (n = 20), Homoscleromorpha (n =  
280 41), and Hexactinellida (n = 2) were included in the analysis. Alpha diversity indices were  
281 computed with Phyloseq (31). The predicted functions of 128 sponge microbiomes with  
282 known LMA-HMA status viz. Demospongiae-LMA (n = 69), Demospongiae-HMA (n = 48),  
283 Calcarea-LMA (n = 4), Homoscleromorpha-LMA (n = 1), Homoscleromorpha-HMA (n =  
284 5), Hexactinellida-LMA (n = 1), as described in a previous study (52), were shared by  
285 Miguel Lurgi (CNRS-Paul Sabatier University, France).

286

287 Comparative analysis of sponge immunological repertoire

288

289 Predicted peptide sequences of representative demosponges (*Amphimedon*  
290 *queenslandica* Hooper & van Soest, 2006 (53), *H. tubifera* (38), *Petrosia* (*Petrosia*)  
291 *ficiformis* (Poiret, 1789) (20)), calcareans (*S. ciliatum*, *Leucosolenia complicata* (Montagu,  
292 1814) (54)), and homoscleromorph (*Oscarella carmela* Muricy & Pearse, 2004) were  
293 annotated against the UniProtKB/Swiss-Prot (April 2020) and Pfam 32.0 (44) database.  
294 Sponge peptide sequences were downloaded from Compagen (55), except for *A.*  
295 *queenslandica*, which was retrieved from Ensembl Metazoa, and *P. ficiformis*, which was  
296 shared by Ana Riesgo (Natural History Museum, London).

297 NACHT domain-containing genes, with bona fide or tripartite NLR gene architecture  
298 (56), were identified from the sponge predicted peptides. Amino acid sequences

299 corresponding to the NACHT domain (PF05729) were used for phylogenetic  
300 comparisons. Multiple sequence alignment was performed using Clustal Omega (57) and  
301 the aligned sequences were manually trimmed. The best-fit substitution model (LG+G+F)  
302 was identified based on Bayesian Information Criterion using protest v3.4.2 (58).  
303 Bayesian inference analysis was performed in MrBayes v.3.2 (59) with two-independent  
304 MCMC runs and four chains per run. The analysis was sampled every 100 trees until the  
305 average standard deviation of split frequencies was <0.01. The first 25% of trees were  
306 discarded as burn-in.

307

308 **Statistical analyses and visualization**

309

310 Community alpha diversity values and expression levels of PRRs were tested for  
311 normality using Shapiro-Wilk test and homogeneity of variance through Levene's test.  
312 Statistical differences were calculated using Welch's t-test or Wilcoxon test with p-values  
313 <0.05 considered statistically significant. KEGG functions and immunological domains  
314 that distinguished among sponge groups were identified using Linear Discriminant  
315 Analysis effect size (LDA-LEfSe) (60) based on relative abundance values. All  
316 visualizations were done using the ggplot2 package (61) in R.

317

318 **Results and Discussion**

319

320 Sponges exhibit differential survival under ocean warming and acidification

321

322 Fragments of the siliceous sponge, *N. compacta* (Fig. 1A), remained healthy under  
323 variable levels of pH and temperature stress, as well as to combinations of these two  
324 stressors (Fig. S4). In contrast, the calcareous sponge, *L. chagosensis* (Fig. 1B), showed  
325 visible tissue necrosis under the warming, RCP 6.0, and RCP 8.5 conditions, but not in  
326 the acidification only treatment (Fig. S4). While up to 97% of *N. compacta* fragments  
327 survived the most extreme condition at RCP 8.5, only 25% of the *L. chagosensis*  
328 fragments survived in the RCP 8.5 treatment after just two days of sustained exposure  
329 (Fig. 1C). These observations are comparable to the findings of other studies that  
330 reported the high survivorship of demosponges and the susceptibility of calcareous  
331 sponges subjected to these climate change-associated stressors (19).

332

333 Bacterial community shifts in the stress response of sponges

334

335 Rarefaction curves indicate the completeness of detected ASVs present in *N.*  
336 *compacta* (Fig. S5A) and *L. chagosensis* (Fig. S5B) across the different treatments.  
337 *Neopetrosia compacta* is associated with a fairly diverse and heterogenous bacterial  
338 assemblage (species richness =  $188.00 \pm 27.78$ ; Shannon diversity index =  $3.68 \pm 0.02$ )  
339 with enrichment of the Chloroflexi-related SAR202 clade (22.23%) and phototrophic  
340 groups, including Nostocales (8.19%) and Synechococcales (0.12%). On the other hand,  
341 *L. chagosensis* harbored a less diverse microbiome (species richness =  $150.33 \pm 53.58$ ;  
342 Shannon diversity index =  $2.04 \pm 0.66$ ) composed primarily of Oceanospirillales (56.17%)  
343 and Deltaproteobacteria SAR324 clade (27.26%) (Fig. 2A-B; Fig. S6, S7A).

344 To explore the possible roles of bacterial community dynamics in the stress  
345 response of the two sponge holobionts, we described the shifts in the taxonomic profiles  
346 of their bacterial associates following exposure to simulated conditions. The microbial  
347 community of *N. compacta* showed little change in structure when subjected to the  
348 various stressors (Fig. 2C). The few ASVs that showed a significant change in abundance  
349 relative to the present day treatment include ASV749 (Microbacteriaceae), which  
350 decreased in Acidification and RCP 6.0 conditions, and ASV842  
351 (Endozoicomonadaceae), ASV2840 (Cellvibrionaceae), ASV73, ASV1088, ASV887,  
352 ASV2836, ASV1181, and ASV2292 (Rhodobacteraceae), ASV2836  
353 (Alteromonadaceae), ASV1181 (Nitrincolaceae), and ASV2292 (Colwelliaceae), which  
354 increased in RCP 6.0 (Fig. S8).

355 In contrast, the bacterial assemblage of *L. chagosensis* exhibited apparent  
356 restructuring with the treatments, although not statistically supported (Fig. 2D, Table S3).  
357 A total of 37 ASVs exhibited changes in relative abundance, with 21 decreasing and 16  
358 increasing (Fig. 2E). In the Acidification treatment, where 100% of the sponges survived,  
359 a decrease in Bacteroidales and Clostridiales and an increase in the most dominant  
360 symbiont, Oceanospirillales, was observed (Fig. S9B). On the other hand, in the  
361 treatments with high sponge mortality (i.e. Warming, RCP 6.0, and RCP 8.5), there was  
362 reduced abundance of ASV2477 (SAR324 clade) and ASV2219  
363 (Endozoicomonadaceae). Presumptive opportunistic taxa, such as Vibrionales (ASV90,  
364 ASV688), Rhodobacterales (ASV1216, ASV1190, ASV1738, ASV2661, ASV1725), and  
365 Rhizobiales (ASV1658) (62), increased in relative abundance under these treatments  
366 (Fig. 2E; Fig. S9B).



367 Taxa that proliferated in the microbial community of *L. chagosensis* under stress  
368 conditions were predicted to invest more in the production of antimicrobial molecules (Fig.  
369 2F), which may be advantageous in competitive colonization of the tissues of the sponge.  
370 The increased abundance of opportunistic taxa may be due to their capacity to form  
371 biofilms for efficient surface adhesion and active secretion of virulence factors to invade  
372 the host cell (63). These traits, along with the ability to sense and respond to  
373 environmental perturbations, as evidenced by enrichment of functions related to two-  
374 component signaling and bacterial chemotaxis, may support successful proliferation of  
375 certain taxa that will eventually outcompete other microbiome members (64). The  
376 resulting large-scale changes in the bacterial community of *L. chagosensis* are predicted  
377 to correlate to a shift in the functional and metabolic potential of the holobiont, which may  
378 further contribute to the decline of the host.

379

380 Sponge immune response under ocean warming and acidification conditions

381

382 To determine how the host innate immune system is affected by acidification and  
383 warming, we described the expression patterns of immune-related genes in *N. compacta*  
384 and *L. chagosensis* using RNA-Seq. A total of 1 596 genes (Acidification = 74, Warming  
385 = 308, RCP 6.0 = 501, RCP 8.5 = 713) were found to be differentially expressed in *L.*  
386 *chagosensis*, whereas only 70 genes (Acidification = 3, Warming = 7, RCP 6.0 = 12, RCP  
387 8.5 = 48) genes were differentially expressed in *N. compacta*.

388 Although reduced environmental pH levels have been reported to induce bacterial  
389 virulence (65), gene ontology (GO) enrichment analysis of differentially expressed genes

390 in the calcareous sponge revealed that *L. chagosensis* is able to mount relevant  
391 responses, including endosome organization and antibacterial humoral response to avoid  
392 pathobiont invasion, under Acidification treatment (Fig. 3A). On the other hand, key  
393 defense mechanisms against microbial perturbations were differentially regulated in *L.*  
394 *chagosensis* under Warming, RCP 6.0, and RCP 8.5 conditions. Specifically, genes  
395 implicated in recognition of microbe-associated molecular patterns (MAMPs) and  
396 receptor-mediated endocytosis were repressed in *L. chagosensis*. In particular,  
397 scavenger receptors (SRCRs), secretin G-protein coupled receptors (GPCRs), and  
398 nucleotide-binding domain and leucine-rich repeat-containing genes (NLRs), exhibited  
399 reduced expression under Warming, RCP 6.0, and RCP 8.5 conditions (Fig. 3B). The  
400 reduction in the expression levels of these genes and the sensor proteins that they  
401 encode, along with the repression of bactericidal permeability-increasing protein (*BPI*)  
402 and lipopolysaccharide binding protein (*LBP*) (Fig. 3C), may result in impaired recognition  
403 of microbial cells or molecules, which, in turn, influences the regulation of downstream  
404 effectors of the immune response (66). Components of other principal machineries  
405 involved in the response to pathogen infection, such as autophagy, inflammation, and  
406 apoptosis, were similarly downregulated (Fig. 3A).

407         Decreased expression of genes involved in tumor necrosis factor (*TNF*) signaling  
408 suggests that *L. chagosensis* may no longer be able to deploy synchronized expression  
409 of effector molecules that mediate diverse aspects of innate immunity (67). While the *TNF*  
410 receptor (*TNFR*) increased in expression, the *TNF* ligand, activator disintegrin and  
411 metalloproteinase domain-containing protein 10 (*ADAM10*), and the adapter protein *TNF*  
412 receptor-associated factor 5 (*TRAF5*) reduced in expression (Fig. 3C). The repression of

413 responses regulated through this pathway is further supported by the downregulation of  
414 immune-related transcription factors, such as interferon regulatory factor 5 (*IRF5*) and  
415 nuclear factor NF-kappa-B p105 subunit (*NFKB1*), coupled with the increased levels of  
416 the *NF-kB* inhibitor (*IKB*) and inhibitor of *NF-kB* kinase (*IKK*) (68). Indeed, the  
417 downregulation of macrophage-expressed gene protein 1 (*MPEG1*), allograft  
418 inflammatory factor-1 (*AIF1*), initiator caspase *CASP2/9*, and executioner caspase  
419 *CASP3/6/7*, suggest inhibited antimicrobial, inflammatory, and apoptotic mechanisms  
420 (69-71). Genes with anti-apoptotic functions, including the apoptosis regulator (*BCL2*),  
421 Bcl-2-like protein 1 (*BCL2L1*), and X-linked inhibitor of apoptosis (*XIAP*) were negatively  
422 regulated, as well. These results generally suggest that *L. chagosensis* may not be able  
423 to restore immune homeostasis under combined warming and acidification conditions.

424 In contrast to the calcareous sponge, the demosponge *N. compacta* exhibited  
425 activation of the complement system and cytokine-induced processes under RCP 8.5  
426 conditions (Fig. 3A). An increased level of *TNF*, along with the upregulation of interleukin-  
427 1 receptor-associated kinase-4 (*IRAK4*), *TRAF5*, and *NFKB1*, indicates that the TNF-  
428 NFkB and Myd88-dependent signaling pathways were activated (72, 73) (Fig. 3C). The  
429 increased expression of *AIF1*, *CASP2/9*, and *CASP3/7*, along with the *BCL2* and *XIAP*,  
430 suggest active inflammatory and apoptotic functions (69, 71). These indicate that *N.*  
431 *compacta* may be able to sustain its ability for symbiont recognition and pathogen  
432 clearance through the coordinated expression of signaling pathways and immune effector  
433 mechanisms even under the most extreme conditions in this study.

434

435 Demosponges and calcareans are characterized by disparate bacterial communities and  
436 immunological repertoires

437

438 Evaluation of the diversity patterns of bacterial communities in representatives  
439 from different sponge classes showed that demosponges typically harbor bacterial  
440 communities with a wide range of taxonomic diversity, whereas calcareans are generally  
441 associated with less diverse bacterial communities (Fig. 4A). Low microbial abundance  
442 has been consistently reported among calcareans through microscopy (74),  
443 metagenomics (51), and culture-based techniques (74). Comparisons of predicted  
444 microbiome functions indicate that there is functional differentiation among HMA and LMA  
445 sponge microbiomes (Fig. 4B). Generally, the bacterial associates of calcareans, along  
446 with LMA demosponges and homoscleromorphs, are enriched for functions related to  
447 metabolism, whereas the bacterial assemblage of HMA demosponges and  
448 homoscleromorphs are enriched for functions related to general cellular processes and  
449 genetic information processing (Fig. 4B; Table S4). In particular, functions related to  
450 cofactor and vitamin metabolism, transport, and catabolism are enriched in the  
451 microbiomes of calcareans. LMA demosponge microbiomes are enriched for xenobiotic  
452 biodegradation and metabolism, terpenoid and polyketides metabolism, and lipid  
453 metabolism. In contrast, the bacterial associates of HMA demosponges and  
454 homoscleromorphs are enriched with genes involved in transcription, translation, protein  
455 processing, signal transduction, cellular community, cell motility, cell growth and death,  
456 and energy metabolism. HMA species have been reported to host bacterial communities  
457 with convergent functional potential, whereas LMA species exhibit greater microbiome

458 differentiation (52, 75). The functional variability of LMA sponge microbiomes is likely  
459 shaped by the metabolic requirements of the holobiont under emerging environmental  
460 conditions.

461 Host phylogeny influences the diversity of the sponge microbiome (76), which may,  
462 in part, be due to species-specific immune receptor complements. Comparison of  
463 immune-related protein domains in representative sponge species revealed lineage-  
464 specific abundance patterns (Fig. 4C). SRCR domain-containing proteins were more  
465 abundant in demosponges. These domains are part of PRRs that recognize a wide array  
466 of bacterial ligands (77). SRCR-containing peptides in calcareans are associated with  
467 diverse combinations of immune or cell-adhesion domains, whereas in demosponges,  
468 the peptides consist mostly of multiple SRCR domains (Fig. 4D). Calcareans also  
469 possess a higher number of genes with secretin GPCR domains (Fig. 4C), a membrane  
470 receptor involved in sensing diverse physiological stimuli and in shaping immune  
471 responses toward extracellular pathogens and danger molecules (78).

472 NLRs are a group of intracellular receptors that detect foreign microbes that are  
473 able to evade extracellular defenses (79). These genes likely play a critical role in  
474 mediating host-symbiont interactions and in differentiating pathogenic from symbiotic  
475 microbes (80). Bona fide NLRs (NLRX) are characterized by both a central NACHT  
476 domain and C-terminal leucine-rich repeats (LRRs) (81). Calcareans possess an  
477 extensive family of NLRs, which group into a separate clade distinct from that of other  
478 metazoan NLRs (Fig. 4E; Fig. S10) (56). Twenty NLRX genes were identified in *S.*  
479 *ciliatum*, 29 in *L. complicata*, and 28 in *L. chagosensis*. In contrast, fewer NLRX genes  
480 were detected in the demosponges, with six in *A. queenslandica*, one in *H. tubifera*, and

481 three in *N. compacta*. Among the 28 NLRX genes in *L. chagosensis*, 11 have a tripartite  
482 architecture with either a CARD (NLRC, n = 7) or DEATH domain (NLRD, n = 4) at the N-  
483 terminal. Other *L. chagosensis* NLRs that are phylogenetically related to NLRX genes  
484 possess only the central NACHT domain alongside either a CARD (CARD-NACHT, n =  
485 11) or DEATH domain (DEATH-NACHT, n = 3). The co-expansion of tripartite NLRC,  
486 CARD-NACHT, and other CARD-containing genes in *L. chagosensis*, as well as in other  
487 calcareans is indicative of enhanced signaling potential from homotypic interactions that  
488 launch immune effector mechanisms (82). This lineage-specific expansion, coupled with  
489 the rich complement of other surface receptors, may have evolved to facilitate the  
490 maintenance of the low abundance and distinct microbiome in calcareans (52) through  
491 efficient selection or phagocytic clearance of interacting microorganisms.

492

493 Sponge holobionts in the future ocean

494

495 Understanding the persistence of sponge holobionts in perturbed and extreme  
496 conditions requires the elucidation of the animal host, the bacterial partners, and their  
497 interactions. Our study revealed that bacterial complement diversity may define the  
498 adaptive capacities of sponge holobionts under future ocean conditions. The HMA  
499 sponge *N. compacta* exhibited greater tolerance to stress compared with LMA sponge *L.*  
500 *chagosensis*, which showed visible tissue necrosis and high mortality to the combined  
501 effects of warming and acidification.

502 The stress tolerance of *N. compacta* was supported by a stable microbiome with  
503 abundant phototrophic members (Fig. S7A, C). Other photosymbiotic sponges,

504 *Carteriospongia foliascens* (Pallas, 1766) and *Cymbastela coralliophila* Hooper &  
505 Bergquist, 1992, have also been shown to have a higher resistance to future ocean  
506 conditions due to enhanced productivity of their cyanobacteria symbionts under elevated  
507 inorganic carbon concentration (83, 84). The notable increase in relative abundance of  
508 photoheterotrophic Rhodobacteraceae (Fig. S8) and the stable population of other  
509 photosymbionts in *N. compacta* (Fig. S9A) may have ameliorated the effects of stress  
510 from acidification and warming.

511 On the other hand, we propose that the susceptibility of *L. chagosensis* to stressors  
512 is linked to the instability of its microbiome, possibly stemming from low taxonomic  
513 diversity (Fig. S6) and low functional redundancy (Fig. S6; Fig. S7B) (85). While  
514 microbiome flexibility in low microbial abundant corals (86) and sponges (87) has been  
515 proposed as a mechanism for rapid adaptation (13), unstable phases during community  
516 restructuring may result in loss of essential functions and offer an opportunity for  
517 pathogen invasion. Large-scale changes in the predicted metabolic capabilities and  
518 pathogenic potential of the restructured *L. chagosensis* microbiome under stress is  
519 consistent with observations on the dysbiotic metagenomes of *R. odorabile* (10) and the  
520 coral, *Porites compressa* (88).

521 We speculate that the difference in bacterial community dynamics in the two  
522 sponges may be underpinned by differences in the host's immune functions. Microbial  
523 recognition in sponges, such as in *Dysidea avara* (Schmidt, 1862) and *Aplysina*  
524 *aerophoba* (Nardo, 1833), involves the expression of genes encoding NLRs, SRCRs, and  
525 GPCRs, along with the activation of apoptotic functions (18). Further, recent studies  
526 provide evidence that symbiont recognition and maintenance among poriferans is

527 mediated by TNF-NF $\kappa$ B dependent pathways (72, 89). Under the simulated stress  
528 conditions, sustained levels of surface receptors and expression of immune effectors in  
529 *N. compacta* may have allowed efficient symbiont recognition and pathogenic clearance,  
530 whereas the broadscale suppression of immune pathways in *L. chagosensis* may have  
531 disrupted the sponge-symbiont interactions and attenuation of the host's defense  
532 mechanisms. Our results mirror reports on adaptive or dysbiotic events in other holobionts  
533 challenged by various environmental perturbations. For instance, the coral,  
534 *Montipora aequituberculata*, which had a stable bacterial community under elevated  
535 temperatures, exhibited regulation of the complement system and phagocytosis (90),  
536 while the dissociation of coral-algal symbiosis in *Orbicella faveolata* following a prolonged  
537 thermal anomaly was accompanied by overall reduced expression of genes implicated in  
538 the TNF pathway and apoptosis (17).

539       The HMA or LMA status of sponges correlates with differences in host physiology  
540 (91) and holobiont strategies for nutrient assimilation and processing (92). Although  
541 sponge pumping rates may vary across species and sponge body size (93), HMA species  
542 generally have slower filtration rates and a denser mesohyl, while LMA demosponges  
543 and calcareans can more rapidly take up large volumes of seawater through their tissues  
544 (91, 94, 95). For example, *Leucetta* can filter about 4.56L hr<sup>-1</sup> (95) while *Neopetrosia*  
545 *problematica* (de Laubenfels, 1930) can only take up 0.53L hr<sup>-1</sup> (94). Differences in  
546 pumping rate and tissue density may influence the degree of exposure to stressors.  
547 Species with higher pumping rates and lower tissue density may be more susceptible to  
548 perturbations as they may have more frequent encounters with pathobionts and are less  
549 protected against the external environment. Under elevated temperature and lowered pH



550 conditions, sponge pumping capacity and skeletal strength may also be adversely  
551 affected, as observed in the glass sponge, *Aphrocallistes vastus* (Schulze, 1886) (96).  
552 Given their LMA status and synapomorphic calcitic spicules, calcareans are likely to be  
553 more negatively affected by future ocean conditions. It is worth noting, however, that *L.*  
554 *chagosensis* survived under reduced pH, which corroborates with the reported survival  
555 and proliferation of *L. complicata* at pH 7.7 (97). Indeed, elevated temperature seems to  
556 be more detrimental to sponges compared to reduced pH (83). However, the predicted  
557 co-occurrence of acidification and warming may cause the narrowing of organismal  
558 thermal tolerance thresholds (98). Surprisingly, the calcaronean sponge, *Sycettusa*  
559 *hastifera*, has been shown to tolerate thermo-acidic stress with little change to its  
560 microbiome and spicules (99). The resistance of *S. hastifera* to perturbed environmental  
561 conditions may be linked to its opportunistic and invasive traits (100).

562       Comparison of the lineage-specific patterns of microbiome diversity and  
563 immunological repertoire among poriferans provides broader insights into the adaptive  
564 capacity of different sponge groups in perturbed ocean conditions. Although sponges are  
565 generally predicted to be winners under future ocean scenarios, species and lineage-  
566 specific holobiont features may define their susceptibility or tolerance to various stress  
567 events. It is thus warranted to further investigate the roles of microbiome flexibility and  
568 immune functions in the stress response of other sponge species representing diverse  
569 groups with different evolutionary histories, morphologies, and microbiome densities.  
570 Given that sponges are critical members of the reef ecosystem, with key roles in nutrient  
571 cycling and substrate consolidation, revealing the mechanisms to their adaptive success  
572 or failure is pivotal in projecting the reef landscape in the future ocean.

573

## 574 **Acknowledgements**

575           We thank Francis Kenith Adolfo, Robert Valenzuela, and Ronald De Guzman for  
576 field and hatchery assistance, and staff of the Bolinao Marine Laboratory for logistical  
577 support. This study was funded by the Department of Science and Technology Philippine  
578 Council for Agriculture, Aquatic and Natural Resources Research and Development  
579 (QMSR- MRRD-MEC-295-1449) to C.C.

580

## 581 **Competing Interests**

582           The authors declare that they have no competing interests.

583

## 584 **References**

- 585 1. Le Quéré C, Moriarty R, Andrew RM, Canadell JG, Sitch S, Korsbakken JI, et al.  
586 Global carbon budget 2015. *Earth System Science Data*. 2015;7:349-96.
- 587 2. Hoegh-Guldberg O, Mumby PJ, Hooten AJ, Steneck RS, Greenfield P, Gomez E,  
588 et al. Coral reefs under rapid climate change and ocean acidification. *science*.  
589 2007;318(5857):1737-42.
- 590 3. Bell JJ, Bennett HM, Rovellini A, Webster NS. Sponges to be winners under near-  
591 future climate scenarios. *Bioscience*. 2018;68(12):955-68.
- 592 4. Bell JJ. The functional roles of marine sponges. *Estuarine, coastal and shelf*  
593 *science*. 2008;79(3):341-53.
- 594 5. Pita L, Rix L, Slaby BM, Franke A, Hentschel U. The sponge holobiont in a  
595 changing ocean: from microbes to ecosystems. *Microbiome*. 2018;6(1):46.
- 596 6. Smith AM, Berman J, Key Jr MM, Winter DJ. Not all sponges will thrive in a high-  
597 CO<sub>2</sub> ocean: Review of the mineralogy of calcifying sponges. *Palaeogeography,*  
598 *palaeoclimatology, palaeoecology*. 2013;392:463-72.
- 599 7. Webster NS, Thomas T. The sponge hologenome. *MBio*. 2016;7(2):e00135-16.
- 600 8. Taylor MW, Radax R, Steger D, Wagner M. Sponge-associated microorganisms:  
601 evolution, ecology, and biotechnological potential. *Microbiol Mol Biol Rev*.  
602 2007;71(2):295-347.
- 603 9. Hentschel U, Piel J, Degnan SM, Taylor MW. Genomic insights into the marine  
604 sponge microbiome. *Nat Rev Microbiol*. 2012;10(9):641-54.

- 605 10. Fan L, Liu M, Simister R, Webster NS, Thomas T. Marine microbial symbiosis  
606 heats up: the phylogenetic and functional response of a sponge holobiont to thermal  
607 stress. *ISME J.* 2013;7(5):991-1002.
- 608 11. Egan S, Gardiner M. Microbial Dysbiosis: Rethinking Disease in Marine  
609 Ecosystems. *Front Microbiol.* 2016;7:991.
- 610 12. Bang C, Dagan T, Deines P, Dubilier N, Duschl WJ, Fraune S, et al.  
611 Metaorganisms in extreme environments: do microbes play a role in organismal  
612 adaptation? *Zoology (Jena).* 2018;127:1-19.
- 613 13. Voolstra CR, Ziegler M. Adapting with Microbial Help: Microbiome Flexibility  
614 Facilitates Rapid Responses to Environmental Change. *Bioessays.*  
615 2020;42(7):e2000004.
- 616 14. Botte ES, Nielsen S, Abdul Wahab MA, Webster J, Robbins S, Thomas T, et al.  
617 Changes in the metabolic potential of the sponge microbiome under ocean acidification.  
618 *Nat Commun.* 2019;10(1):4134.
- 619 15. Thompson JR, Rivera HE, Closek CJ, Medina M. Microbes in the coral holobiont:  
620 partners through evolution, development, and ecological interactions. *Front Cell Infect*  
621 *Microbiol.* 2014;4:176.
- 622 16. Pollock FJ, Lamb JB, van de Water J, Smith HA, Schaffelke B, Willis BL, et al.  
623 Reduced diversity and stability of coral-associated bacterial communities and suppressed  
624 immune function precedes disease onset in corals. *R Soc Open Sci.* 2019;6(6):190355.
- 625 17. Pinzon JH, Kamel B, Burge CA, Harvell CD, Medina M, Weil E, et al. Whole  
626 transcriptome analysis reveals changes in expression of immune-related genes during  
627 and after bleaching in a reef-building coral. *R Soc Open Sci.* 2015;2(4):140214.
- 628 18. Pita L, Hoepfner MP, Ribes M, Hentschel U. Differential expression of immune  
629 receptors in two marine sponges upon exposure to microbial-associated molecular  
630 patterns. *Sci Rep.* 2018;8(1):16081.
- 631 19. Guzman C, Conaco C. Gene expression dynamics accompanying the sponge  
632 thermal stress response. *PLoS one.* 2016;11(10):e0165368.
- 633 20. Riesgo A, Farrar N, Windsor PJ, Giribet G, Leys SP. The analysis of eight  
634 transcriptomes from all poriferan classes reveals surprising genetic complexity in  
635 sponges. *Mol Biol Evol.* 2014;31(5):1102-20.
- 636 21. Germer J, Cerveau N, Jackson DJ. The Holo-Transcriptome of a Calcified Early  
637 Branching Metazoan. *Frontiers in Marine Science.* 2017;4.
- 638 22. Ryu T, Seridi L, Moitinho-Silva L, Oates M, Liew YJ, Mavromatis C, et al.  
639 Hologenome analysis of two marine sponges with different microbiomes. *BMC Genomics.*  
640 2016;17:158.
- 641 23. Carballo JL, Bell JJ. Climate change, ocean acidification and sponges. Cham:  
642 Springer. 2017.
- 643 24. Hooper JNA, Van Soest RWM. *Systema Porifera. A guide to the classification of*  
644 *sponges. Systema Porifera: Springer; 2002. p. 1-7.*
- 645 25. Pachauri RK, Allen MR, Barros VR, Broome J, Cramer W, Christ R, et al. Climate  
646 change 2014: synthesis report. Contribution of Working Groups I, II and III to the fifth  
647 assessment report of the Intergovernmental Panel on Climate Change: *Ipcc; 2014.*
- 648 26. Pierrot DE, Lewis E, Wallace DWR. MS Excel program developed for CO<sub>2</sub> system  
649 calculations. Carbon Dioxide Information Analysis Center, Oak Ridge National  
650 Laboratory, US Department of Energy. ORNL/CDIAC-IOS. 2006.

- 651 27. Herlemann DP, Labrenz M, Jurgens K, Bertilsson S, Waniek JJ, Andersson AF.  
652 Transitions in bacterial communities along the 2000 km salinity gradient of the Baltic Sea.  
653 ISME J. 2011;5(10):1571-9.
- 654 28. Bolyen E, Rideout JR, Dillon MR, Bokulich NA, Abnet CC, Al-Ghalith GA, et al.  
655 Reproducible, interactive, scalable and extensible microbiome data science using QIIME  
656 2. Nat Biotechnol. 2019;37(8):852-7.
- 657 29. Callahan BJ, McMurdie PJ, Rosen MJ, Han AW, Johnson AJ, Holmes SP. DADA2:  
658 High-resolution sample inference from Illumina amplicon data. Nat Methods.  
659 2016;13(7):581-3.
- 660 30. Quast C, Pruesse E, Yilmaz P, Gerken J, Schweer T, Yarza P, et al. The SILVA  
661 ribosomal RNA gene database project: improved data processing and web-based tools.  
662 Nucleic Acids Res. 2013;41(Database issue):D590-6.
- 663 31. McMurdie PJ, Holmes S. phyloseq: an R package for reproducible interactive  
664 analysis and graphics of microbiome census data. PLoS One. 2013;8(4):e61217.
- 665 32. Dixon P. VEGAN, a package of R functions for community ecology. Journal of  
666 Vegetation Science. 2003;14(6):927-30.
- 667 33. McMurdie PJ, Holmes S. Waste not, want not: why rarefying microbiome data is  
668 inadmissible. PLoS Comput Biol. 2014;10(4):e1003531.
- 669 34. Douglas GM, Maffei VJ, Zaneveld JR, Yurgel SN, Brown JR, Taylor CM, et al.  
670 PICRUSt2 for prediction of metagenome functions. Nat Biotechnol. 2020;38(6):685-8.
- 671 35. Asshauer KP, Wemheuer B, Daniel R, Meinicke P. Tax4Fun: predicting functional  
672 profiles from metagenomic 16S rRNA data. Bioinformatics. 2015;31(17):2882-4.
- 673 36. Bolger AM, Lohse M, Usadel B. Trimmomatic: a flexible trimmer for Illumina  
674 sequence data. Bioinformatics. 2014;30(15):2114-20.
- 675 37. Haas BJ, Papanicolaou A, Yassour M, Grabherr M, Blood PD, Bowden J, et al. De  
676 novo transcript sequence reconstruction from RNA-seq using the Trinity platform for  
677 reference generation and analysis. Nature protocols. 2013;8(8):1494.
- 678 38. Guzman C, Conaco C. Comparative transcriptome analysis reveals insights into  
679 the streamlined genomes of haplosclerid demosponges. Sci Rep. 2016;6:18774.
- 680 39. Langmead B, Trapnell C, Pop M, Salzberg SL. Ultrafast and memory-efficient  
681 alignment of short DNA sequences to the human genome. Genome Biol. 2009;10(3):R25.
- 682 40. Li B, Fillmore N, Bai Y, Collins M, Thomson JA, Stewart R, et al. Evaluation of de  
683 novo transcriptome assemblies from RNA-Seq data. Genome Biol. 2014;15(12):553.
- 684 41. Smith-Unna R, Bournsnel C, Patro R, Hibberd JM, Kelly S. TransRate: reference-  
685 free quality assessment of de novo transcriptome assemblies. Genome Res.  
686 2016;26(8):1134-44.
- 687 42. Simao FA, Waterhouse RM, Ioannidis P, Kriventseva EV, Zdobnov EM. BUSCO:  
688 assessing genome assembly and annotation completeness with single-copy orthologs.  
689 Bioinformatics. 2015;31(19):3210-2.
- 690 43. Conesa A, Gotz S. Blast2GO: A comprehensive suite for functional analysis in  
691 plant genomics. Int J Plant Genomics. 2008;2008:619832.
- 692 44. Finn RD, Bateman A, Clements J, Coggill P, Eberhardt RY, Eddy SR, et al. Pfam:  
693 the protein families database. Nucleic acids research. 2014;42(D1):D222-D30.
- 694 45. Eddy SR. Profile hidden Markov models. Bioinformatics (Oxford, England).  
695 1998;14(9):755-63.

- 696 46. Li B, Dewey CN. RSEM: accurate transcript quantification from RNA-Seq data with  
697 or without a reference genome. *BMC Bioinformatics*. 2011;12:323.
- 698 47. Robinson MD, McCarthy DJ, Smyth GK. edgeR: a Bioconductor package for  
699 differential expression analysis of digital gene expression data. *Bioinformatics*.  
700 2010;26(1):139-40.
- 701 48. Alexa A, Rahnenführer J. Gene set enrichment analysis with topGO. *Bioconductor*  
702 *Improv*. 2009;27.
- 703 49. Szklarczyk D, Gable AL, Lyon D, Junge A, Wyder S, Huerta-Cepas J, et al.  
704 STRING v11: protein-protein association networks with increased coverage, supporting  
705 functional discovery in genome-wide experimental datasets. *Nucleic Acids Res*.  
706 2019;47(D1):D607-D13.
- 707 50. Shannon P, Markiel A, Ozier O, Baliga NS, Wang JT, Ramage D, et al. Cytoscape:  
708 a software environment for integrated models of biomolecular interaction networks.  
709 *Genome research*. 2003;13(11):2498-504.
- 710 51. Moitinho-Silva L, Nielsen S, Amir A, Gonzalez A, Ackermann GL, Cerrano C, et al.  
711 The sponge microbiome project. *Gigascience*. 2017;6(10):1-7.
- 712 52. Lurgi M, Thomas T, Wemheuer B, Webster NS, Montoya JM. Modularity and  
713 predicted functions of the global sponge-microbiome network. *Nat Commun*.  
714 2019;10(1):992.
- 715 53. Srivastava M, Simakov O, Chapman J, Fahey B, Gauthier ME, Mitros T, et al. The  
716 Amphimedon queenslandica genome and the evolution of animal complexity. *Nature*.  
717 2010;466(7307):720-6.
- 718 54. Fortunato SA, Adamski M, Ramos OM, Leininger S, Liu J, Ferrier DE, et al.  
719 Calcisponges have a ParaHox gene and dynamic expression of dispersed NK homeobox  
720 genes. *Nature*. 2014;514(7524):620-3.
- 721 55. Hemmrich G, Bosch TC. Compagen, a comparative genomics platform for early  
722 branching metazoan animals, reveals early origins of genes regulating stem-cell  
723 differentiation. *Bioessays*. 2008;30(10):1010-8.
- 724 56. Yuen B, Bayes JM, Degnan SM. The characterization of sponge NLRs provides  
725 insight into the origin and evolution of this innate immune gene family in animals. *Mol Biol*  
726 *Evol*. 2014;31(1):106-20.
- 727 57. Madeira F, Park YM, Lee J, Buso N, Gur T, Madhusoodanan N, et al. The EMBL-  
728 EBI search and sequence analysis tools APIs in 2019. *Nucleic Acids Res*.  
729 2019;47(W1):W636-W41.
- 730 58. Darriba D, Taboada GL, Doallo R, Posada D. ProtTest 3: fast selection of best-fit  
731 models of protein evolution. *Bioinformatics*. 2011;27(8):1164-5.
- 732 59. Ronquist F, Huelsenbeck JP. MrBayes 3: Bayesian phylogenetic inference under  
733 mixed models. *Bioinformatics*. 2003;19(12):1572-4.
- 734 60. Segata N, Izard J, Waldron L, Gevers D, Miropolsky L, Garrett WS, et al.  
735 Metagenomic biomarker discovery and explanation. *Genome Biol*. 2011;12(6):R60.
- 736 61. Wickham H. ggplot2: elegant graphics for data analysis: springer; 2016.
- 737 62. McDevitt-Irwin JM, Baum JK, Garren M, Vega Thurber RL. Responses of Coral-  
738 Associated Bacterial Communities to Local and Global Stressors. *Frontiers in Marine*  
739 *Science*. 2017;4(262).
- 740 63. Hori K, Matsumoto S. Bacterial adhesion: from mechanism to control. *Biochemical*  
741 *Engineering Journal*. 2010;48(3):424-34.

- 742 64. Yao J, Allen C. Chemotaxis is required for virulence and competitive fitness of the  
743 bacterial wilt pathogen *Ralstonia solanacearum*. *J Bacteriol.* 2006;188(10):3697-708.
- 744 65. Do H, Makthal N, VanderWal AR, Saavedra MO, Olsen RJ, Musser JM, et al.  
745 Environmental pH and peptide signaling control virulence of *Streptococcus pyogenes* via  
746 a quorum-sensing pathway. *Nat Commun.* 2019;10(1):2586.
- 747 66. Chu H, Mazmanian SK. Innate immune recognition of the microbiota promotes  
748 host-microbial symbiosis. *Nat Immunol.* 2013;14(7):668-75.
- 749 67. Bazzoni F, Beutler B. The tumor necrosis factor ligand and receptor families. *N*  
750 *Engl J Med.* 1996;334(26):1717-25.
- 751 68. Hayden MS, Ghosh S. Regulation of NF-kappaB by TNF family cytokines. *Semin*  
752 *Immunol.* 2014;26(3):253-66.
- 753 69. Parrish AB, Freel CD, Kornbluth S. Cellular mechanisms controlling caspase  
754 activation and function. *Cold Spring Harb Perspect Biol.* 2013;5(6).
- 755 70. Wiens M, Korzhev M, Krasko A, Thakur NL, Perovic-Ottstadt S, Breter HJ, et al.  
756 Innate immune defense of the sponge *Suberites domuncula* against bacteria involves a  
757 MyD88-dependent signaling pathway. Induction of a perforin-like molecule. *J Biol Chem.*  
758 2005;280(30):27949-59.
- 759 71. Muller WE, Muller IM. Origin of the metazoan immune system: identification of the  
760 molecules and their functions in sponges. *Integr Comp Biol.* 2003;43(2):281-92.
- 761 72. Yuen B. Deciphering the genomic toolkit underlying animal-bacteria interactions –  
762 insights through the demosponge *Amphimedon queenslandica*: School of Biological  
763 Sciences, The University of Queensland; 2016.
- 764 73. Gauthier ME, Du Pasquier L, Degnan BM. The genome of the sponge  
765 *Amphimedon queenslandica* provides new perspectives into the origin of Toll-like and  
766 interleukin 1 receptor pathways. *Evol Dev.* 2010;12(5):519-33.
- 767 74. Roue M, Quevrain E, Domart-Coulon I, Bourguet-Kondracki ML. Assessing  
768 calcareous sponges and their associated bacteria for the discovery of new bioactive  
769 natural products. *Nat Prod Rep.* 2012;29(7):739-51.
- 770 75. Fan L, Reynolds D, Liu M, Stark M, Kjelleberg S, Webster NS, et al. Functional  
771 equivalence and evolutionary convergence in complex communities of microbial sponge  
772 symbionts. *Proc Natl Acad Sci U S A.* 2012;109(27):E1878-87.
- 773 76. Thomas T, Moitinho-Silva L, Lurgi M, Bjork JR, Easson C, Astudillo-Garcia C, et  
774 al. Diversity, structure and convergent evolution of the global sponge microbiome. *Nat*  
775 *Commun.* 2016;7:11870.
- 776 77. Yap NV, Whelan FJ, Bowdish DM, Golding GB. The Evolution of the Scavenger  
777 Receptor Cysteine-Rich Domain of the Class A Scavenger Receptors. *Front Immunol.*  
778 2015;6:342.
- 779 78. Hohenhaus DM, Schaale K, Le Cao KA, Seow V, Iyer A, Fairlie DP, et al. An mRNA  
780 atlas of G protein-coupled receptor expression during primary human  
781 monocyte/macrophage differentiation and lipopolysaccharide-mediated activation  
782 identifies targetable candidate regulators of inflammation. *Immunobiology.*  
783 2013;218(11):1345-53.
- 784 79. von Moltke J, Ayres JS, Kofoed EM, Chavarria-Smith J, Vance RE. Recognition of  
785 bacteria by inflammasomes. *Annu Rev Immunol.* 2013;31:73-106.

- 786 80. Robertson SJ, Rubino SJ, Geddes K, Philpott DJ. Examining host-microbial  
787 interactions through the lens of NOD: From plants to mammals. *Semin Immunol.*  
788 2012;24(1):9-16.
- 789 81. Ting JP, Lovering RC, Alnemri ES, Bertin J, Boss JM, Davis BK, et al. The NLR  
790 gene family: a standard nomenclature. *Immunity.* 2008;28(3):285-7.
- 791 82. Messier-Solek C, Buckley KM, Rast JP. Highly diversified innate receptor systems  
792 and new forms of animal immunity. *Semin Immunol.* 2010;22(1):39-47.
- 793 83. Bennett HM, Altenrath C, Woods L, Davy SK, Webster NS, Bell JJ. Interactive  
794 effects of temperature and pCO<sub>2</sub> on sponges: from the cradle to the grave. *Glob Chang*  
795 *Biol.* 2017;23(5):2031-46.
- 796 84. Luter HM, Andersen M, Versteegen E, Laffy P, Uthicke S, Bell JJ, et al. Cross-  
797 generational effects of climate change on the microbiome of a photosynthetic sponge.  
798 *Environ Microbiol.* 2020.
- 799 85. Girvan MS, Campbell CD, Killham K, Prosser JI, Glover LA. Bacterial diversity  
800 promotes community stability and functional resilience after perturbation. *Environ*  
801 *Microbiol.* 2005;7(3):301-13.
- 802 86. Ziegler M, Grupstra CGB, Barreto MM, Eaton M, BaOmar J, Zubier K, et al. Coral  
803 bacterial community structure responds to environmental change in a host-specific  
804 manner. *Nat Commun.* 2019;10(1):3092.
- 805 87. Ribes M, Calvo E, Movilla J, Logares R, Coma R, Pelejero C. Restructuring of the  
806 sponge microbiome favors tolerance to ocean acidification. *Environ Microbiol Rep.*  
807 2016;8(4):536-44.
- 808 88. Vega Thurber R, Willner-Hall D, Rodriguez-Mueller B, Desnues C, Edwards RA,  
809 Angly F, et al. Metagenomic analysis of stressed coral holobionts. *Environ Microbiol.*  
810 2009;11(8):2148-63.
- 811 89. Jahn MT, Arkhipova K, Markert SM, Stigloher C, Lachnit T, Pita L, et al. A Phage  
812 Protein Aids Bacterial Symbionts in Eukaryote Immune Evasion. *Cell Host Microbe.*  
813 2019;26(4):542-50 e5.
- 814 90. van de Water J, Chaib De Mares M, Dixon GB, Raina JB, Willis BL, Bourne DG,  
815 et al. Antimicrobial and stress responses to increased temperature and bacterial  
816 pathogen challenge in the holobiont of a reef-building coral. *Mol Ecol.* 2018;27(4):1065-  
817 80.
- 818 91. Weisz JB, Lindquist N, Martens CS. Do associated microbial abundances impact  
819 marine demosponge pumping rates and tissue densities? *Oecologia.* 2008;155(2):367-  
820 76.
- 821 92. Rix L, Ribes M, Coma R, Jahn MT, de Goeij JM, van Oevelen D, et al. Heterotrophy  
822 in the earliest gut: a single-cell view of heterotrophic carbon and nitrogen assimilation in  
823 sponge-microbe symbioses. *ISME J.* 2020;14(10):2554-67.
- 824 93. Morganti TM, Ribes M, Yahel G, Coma R. Size Is the Major Determinant of  
825 Pumping Rates in Marine Sponges. *Front Physiol.* 2019;10:1474.
- 826 94. Ludeman DA, Reidenbach MA, Leys SP. The energetic cost of filtration by  
827 demosponges and their behavioural response to ambient currents. *Journal of*  
828 *Experimental Biology.* 2017;220(6):995-1007.
- 829 95. Perea-Blazquez A, Davy SK, Bell JJ. Estimates of particulate organic carbon  
830 flowing from the pelagic environment to the benthos through sponge assemblages. *PLoS*  
831 *One.* 2012;7(1):e29569.

- 832 96. Stevenson A, Archer SK, Schultz JA, Dunham A, Marliave JB, Martone P, et al.  
833 Warming and acidification threaten glass sponge *Aphrocallistes vastus* pumping and reef  
834 formation. *Sci Rep.* 2020;10(1):8176.
- 835 97. Peck LS, Clark MS, Power D, Reis J, Batista FM, Harper EM. Acidification effects  
836 on biofouling communities: winners and losers. *Glob Chang Biol.* 2015;21(5):1907-13.
- 837 98. Pörtner HO, Langenbuch M, Michaelidis B. Synergistic effects of temperature  
838 extremes, hypoxia, and increases in CO<sub>2</sub> on marine animals: From Earth history to global  
839 change. *Journal of Geophysical Research: Oceans.* 2005;110(C9).
- 840 99. Ribeiro B, Padua A, Barno A, Villela H, Duarte G, Rossi A, et al. Assessing  
841 skeleton and microbiome responses of a calcareous sponge under thermal and pH  
842 stresses. *ICES Journal of Marine Science.* 2020.
- 843 100. Lanna E, Klautau M. Life history and reproductive dynamics of the cryptogenic  
844 calcareous sponge *Sycettusa hastifera* (Porifera, Calcarea) living in tropical rocky shores.  
845 *Journal of the Marine Biological Association of the United Kingdom.* 2018;98(3):505-14.  
846  
847

848

849

850

851

852

853

854

855

856

857

858

859

860

861

862



863 **Figure legends**

864

865 Fig.1. Sponge holobiont features and survivorship under future ocean conditions.  
866 Representative images of (A) *Neopetrosia compacta* and (B) *Leucetta chagosensis* in  
867 their natural habitats. (C) Survival probability of *N. compacta* (top) and *L. chagosensis*  
868 (bottom) throughout the duration of the experiment visualized using Kaplan-Meier survival  
869 analysis.

870

871 Fig. 2. Bacterial community restructuring across stress treatments. (A) Relative abundance  
872 of major ( $\geq 1\%$ ) bacterial Orders in the *Neopetrosia compacta* and *Leucetta chagosensis*  
873 microbiomes. (B) NMDS clustering of sponge-associated microbial communities. Diversity  
874 and structure of (C) *N. compacta* and (D) *L. chagosensis* microbiomes under variable  
875 stress conditions. Graphs show NMDS clustering of samples. Box plots of Simpson  
876 diversity index ( $1/D$ ) are shown above each graph. Colors represent different treatments  
877 (blue, Present Day; skyblue, Acidification; yellow, Warming; orange, RCP 6.0; red,  
878 RCP8.5). (E) Plot of differentially abundant ASVs in *L. chagosensis* relative to the Present  
879 Day samples. (F) Bubble plot of differentially enriched KEGG pathways in *L. chagosensis*  
880 relative to the Present Day samples. Bubble size indicates relative abundance.

881

882 Fig. 3. Immune responses to different treatment conditions. (A) Gene Ontology (GO)  
883 enrichment analysis for the up and downregulated transcripts in *Neopetrosia compacta*  
884 and *Leucetta chagosensis* under the different treatments. Only immune-related GO terms  
885 are presented. (B) Expression levels of major pattern recognition receptors are presented

886 as the log<sub>2</sub> transformed TPM values in *N. compacta* (left) compared with *L. chagosensis*  
887 (right). NLRX refers to NACHT-containing genes with bona fide NLR architecture. Colors  
888 represent different treatments. Asterisks indicate significant change ( $p < 0.05$ ) in  
889 expression relative to the Present Day samples, as determined through Welch's t-test or  
890 Wilcoxon test. (C) Protein interaction network of immune-related genes in *L. chagosensis*  
891 (right) and *N. compacta* (left). Relative expression of genes was computed as the sum of  
892 TPM values relative to the Present Day samples (blue, low; red, high; gray, no match).  
893 Genes with at least one differentially expressed transcript are marked by black borders.  
894 The network is based on human protein-protein interactions.

895

896 Fig. 4. Microbiomes and immunological repertoire of sponges. (A) Taxonomic diversity  
897 (Shannon index) of bacterial communities of healthy sponge adults retrieved from the  
898 Sponge Microbiome Project. Yellow and blue circles represent diversity of the bacterial  
899 communities of *N. compacta* and *L. chagosensis*, respectively. (B) Enrichment of  
900 predicted functions (red, high; blue, low) in the microbiome associated with LMA or HMA  
901 sponges from different classes (Demospongiae, Demo; Calcarea, Calc;  
902 Homoscleromorpha, Homo; Hexactinellida, Hexa). Asterisks denote significant  
903 enrichment of functions in a specific sponge group, as determined through LDA-LEfSe.  
904 (C) Abundance of peptides containing selected Pfam domains across species. Bubble  
905 size indicates the percent of peptides containing a specific domain relative to the total  
906 number of predicted peptides in each species. Colors represent sponge class (yellow,  
907 Demospongiae; red, Homoscleromorpha; blue, Calcarea). Asterisks denote significantly  
908 higher counts of PFAM domains for a specific sponge class, as determined through LDA-

909 LEfSe. (D) Abundance and diversity of SRCR-containing peptides across species. The  
910 percent of SRCR-containing peptides (left) and the count of SRCR peptides associated  
911 with other PFAM domains (right) are presented for each species. (E) Diversification of  
912 bona fide NLRs in Demosponges and Calcareans. The phylogenetic tree was derived  
913 from Bayesian analysis. Numbers on selected branches represent Bayesian posterior  
914 probabilities. Outer and inner color strips indicate species and peptide architectures,  
915 respectively. Species abbreviations: *Amphimedon queenslandica* (Aque), *Haliclona*  
916 *tubifera* (Htub), *Petrosia ficiformis* (Pfic), *Neopetrosia compacta* (Ncom), *Oscarella*  
917 *carmela* (Ocar), *Leucetta chagosensis* (Lcha), *Sycon ciliatum* (Scil), *Leucosolenia*  
918 *complicata* (Lcom).

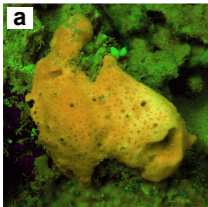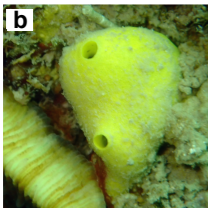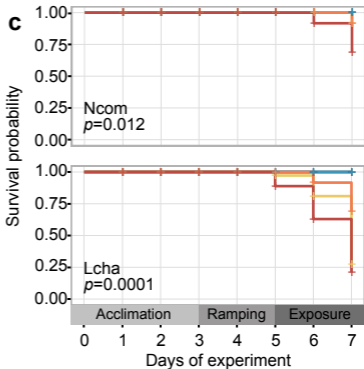

Treatment

- Present Day
- Acidification
- RCP 6.0
- Warming
- RCP 8.5

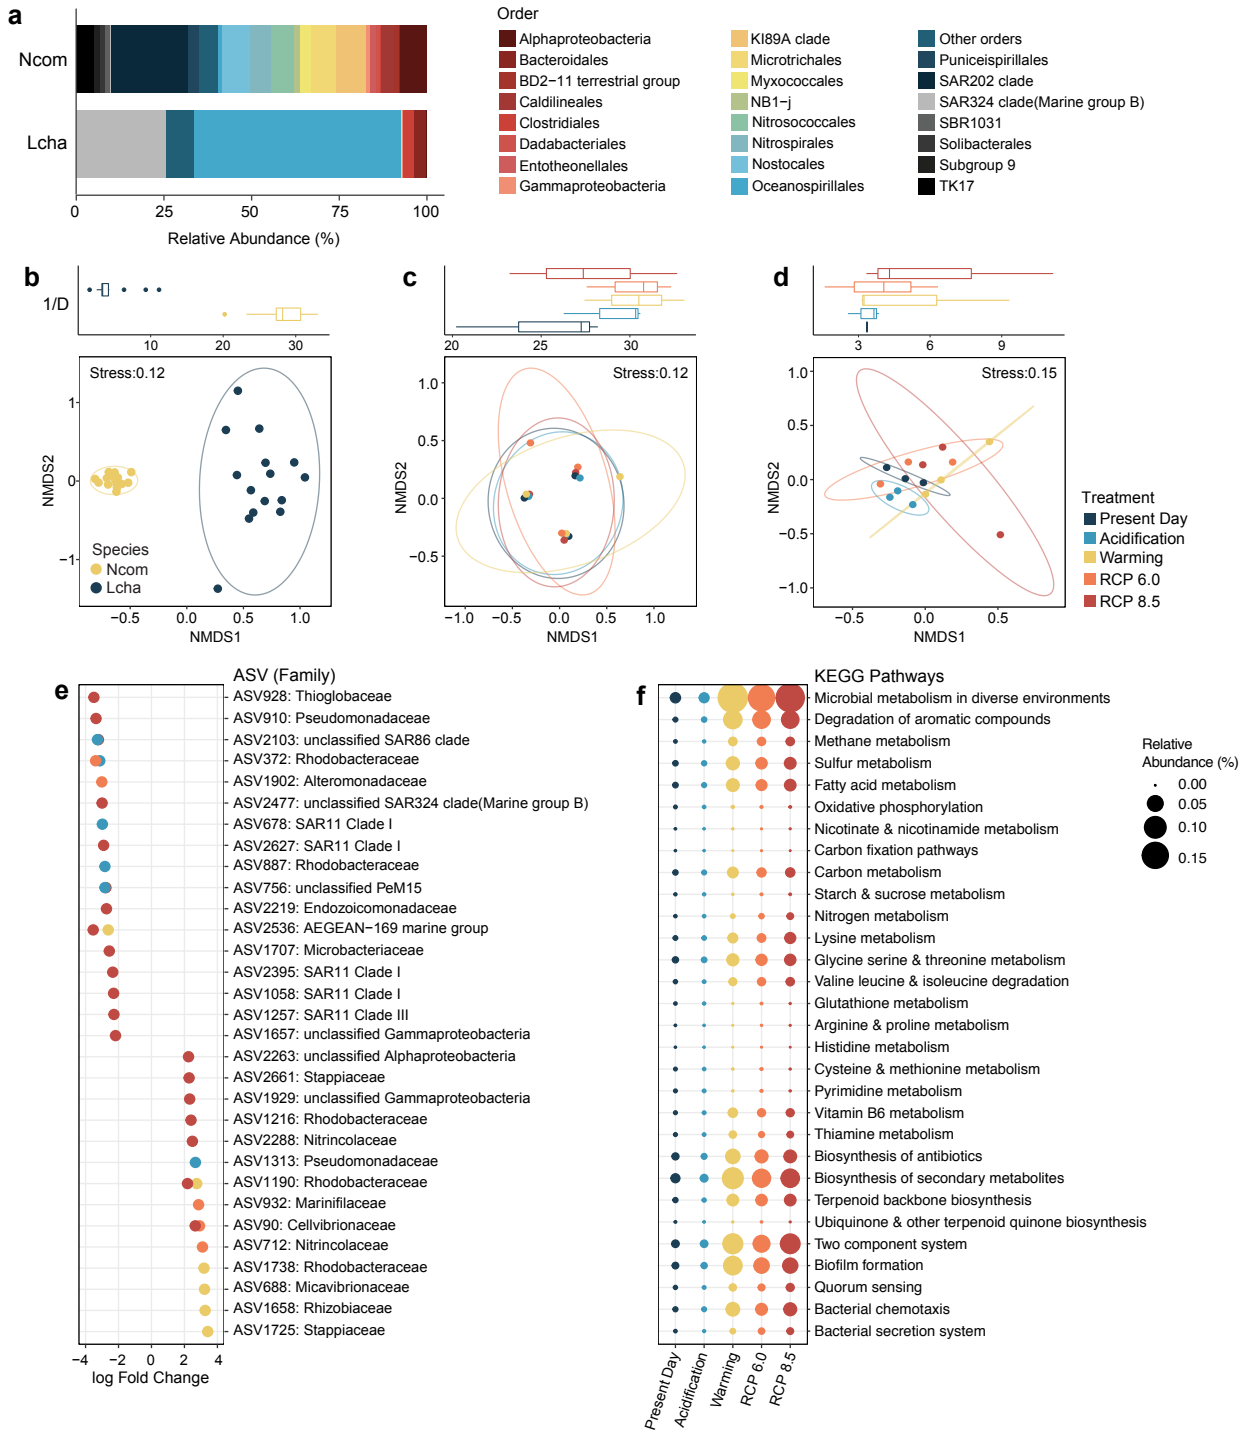

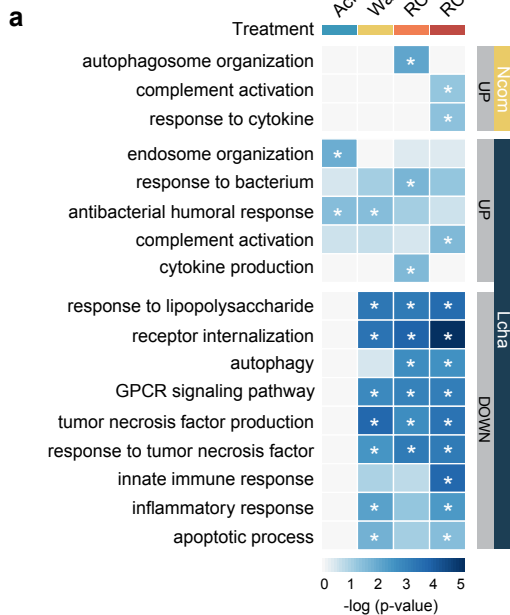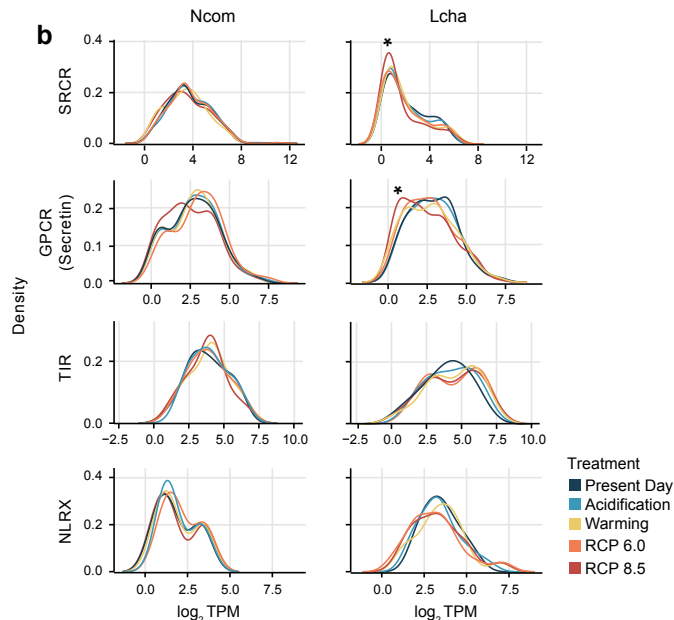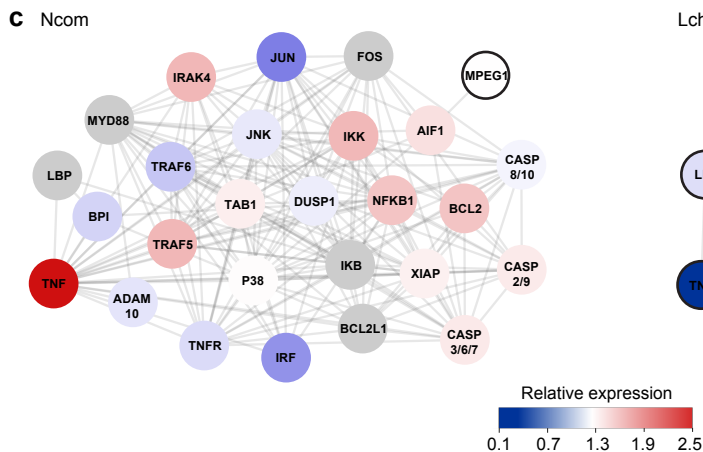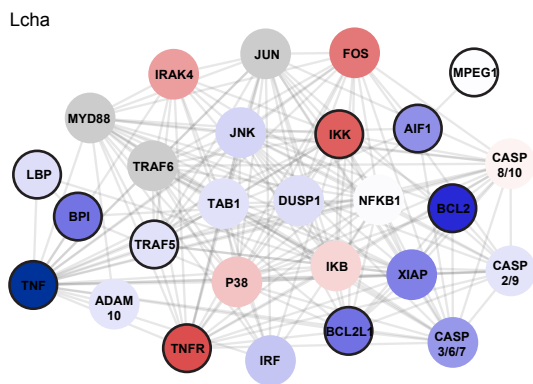

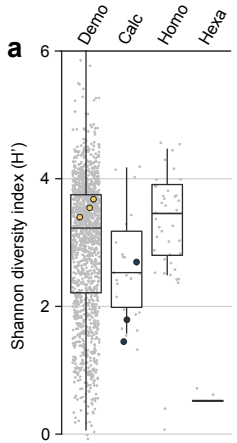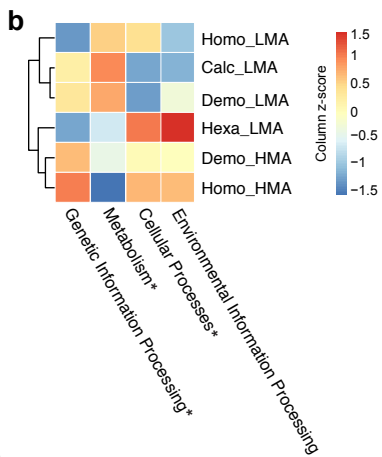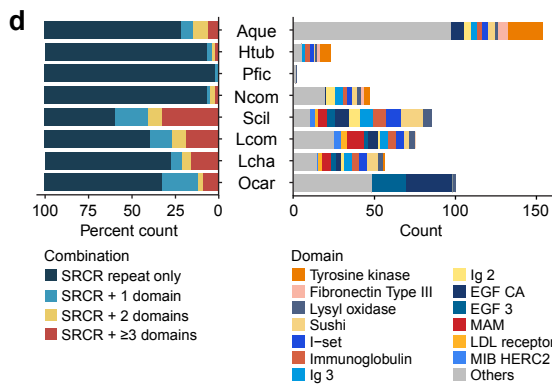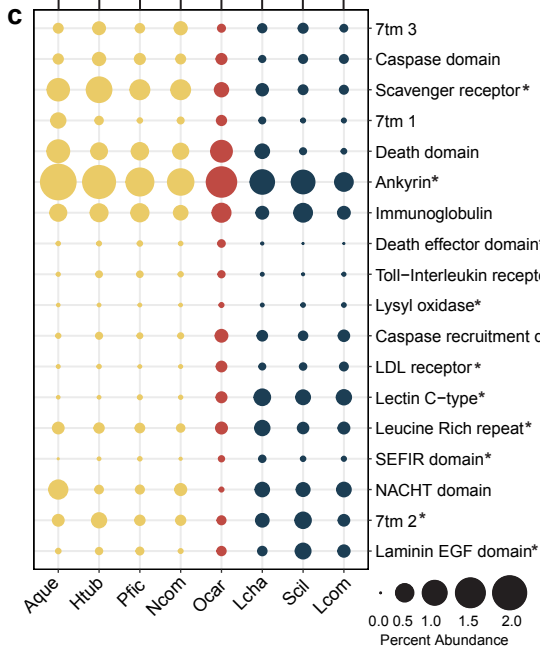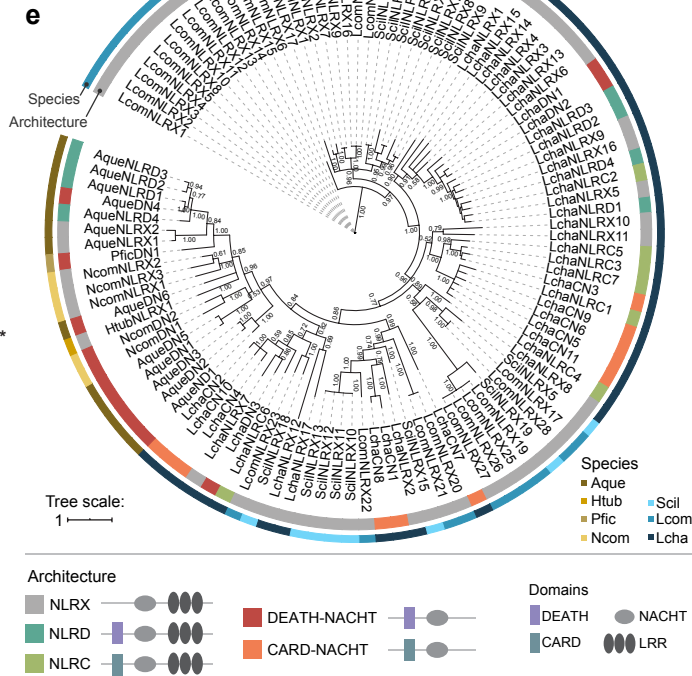

Source: https://www.biorxiv.org/content/biorxiv/early/2021/06/20/2021.06.20.449181.full.pdf
